# Supplementary material for: Synthesis of zeolites from circulated fluidized bed coal fly ash
Source: Royal Society of Chemistry journal article supplement (doi:10.1039/d1qi01571k), 2022-01-01
Supplement: d1qi01571k1.pdf [file d1qi01571k1.pdf]

## **Synthesis of Zeolite from Circulated Fluidized Bed Coal Fly Ash**

Wei Feng<sup>1</sup>, Guoping Hu<sup>1</sup>, Eric F. May<sup>1</sup>, Gang Kevin Li\*<sup>2</sup>

<sup>1</sup>Fluid Science & Resources Division, Department of Chemical Engineering, the University of Western Australia, Crawley, WA, Australia 6009

<sup>2</sup>Department of Chemical Engineering, the University of Melbourne, Parkville, VIC, Australia 3010

### **(Supportive Information)**

Corresponding Author:

\*Dr. Kevin Gang Li

E-mail: [li.g@unimelb.edu.au](mailto:li.g@unimelb.edu.au)

Postal Address: Department of Chemical Engineering

The University of Melbourne, VIC 3010 Australia

Tel.: +61 3 9035 7514

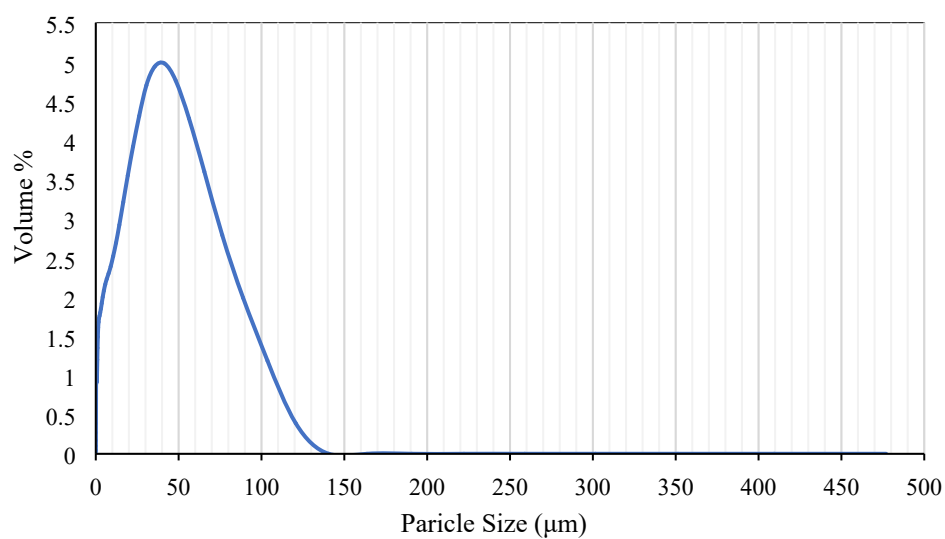

**Fig. S1.** Particle size distribution of CFBFA.

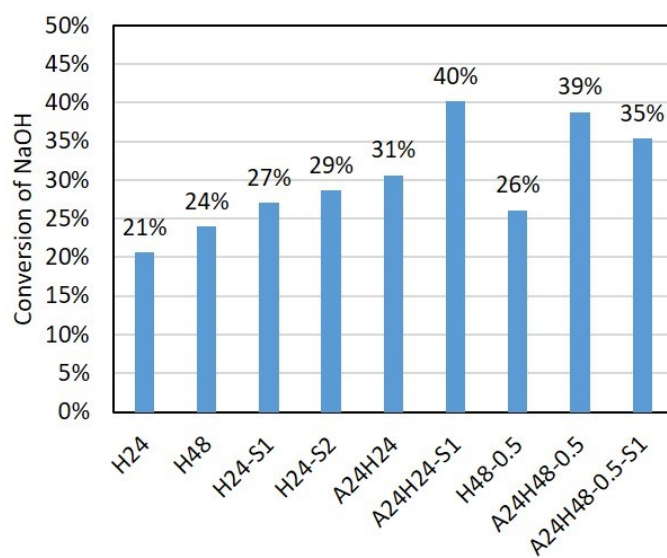

**Fig. S2.** The effect of hydrothermal time, ageing and seeding on the conversion of NaOH.

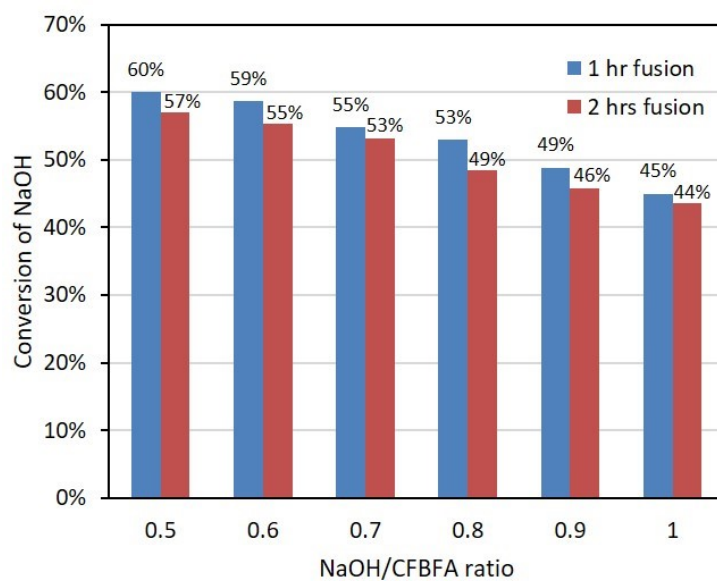

**Fig. S3.** The effect of fusion time on the conversion of NaOH.

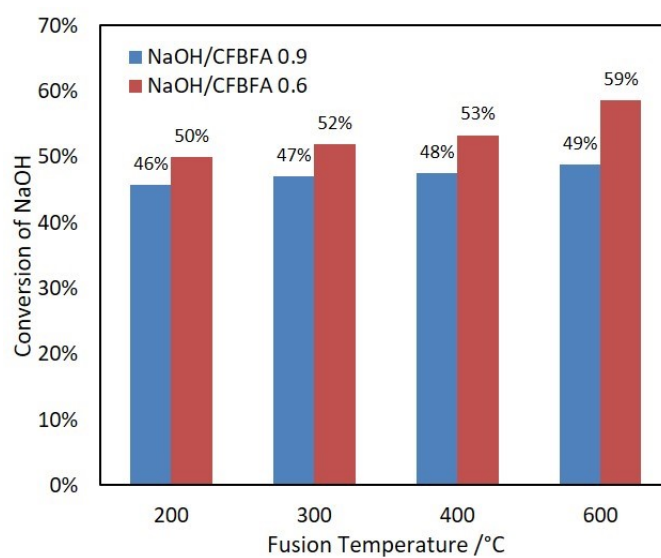

**Fig. S4.** The effect of fusion temperature on the conversion of NaOH.
